# Supplementary material
Source: PubMed Central journal article supplement (PMC2570372)
Supplement: NIHMS61501-supplement-si20060830_033.pdf [file NIHMS61501-supplement-si20060830_033.pdf]

## Determination of $(\Delta S/S_0)^{cor}$ for REDOR and fpCTDQBU analyses

This material considers determination of  $(\Delta S/S_0)^{cor}$ , the contribution to  $(\Delta S/S_0)^{exp}$  due only to the labeled nuclei.  $(\Delta S/S_0)^{cor}$  is equivalently described by the parameter “ $f$ ”, the  $S_1/S_0$  ratio for the labeled  $^{13}\text{CO}$  nuclei considering only other labeled nuclei. Comparison of  $(\Delta S/S_0)^{cor}$  to  $(\Delta S/S_0)^{sim}$  yields the labeled nuclei internuclear dipolar couplings and distances. In the equations in this section, the subscript  $i$  (referring to dephasing time  $\tau_i$ ) is not written. Contributions to  $S_0$  and  $S_1$  are considered for  $^{13}\text{CO}$  nuclei in different environments.

### A. REDOR analysis of I4 peptide

The following parameters/approximations are used:

- A1.** There is 99% labeling of the Ala-9  $^{13}\text{CO}$  and Ala-13  $^{15}\text{N}$  sites.  $S_1 = S_0$  for a labeled Ala-9  $^{13}\text{CO}$  in a molecule with a Ala-13  $^{14}\text{N}$ .
- A2.** Effects of natural abundance  $^{15}\text{N}$  on  $^{13}\text{CO}$   $S_1$  signals are evaluated using the following criteria: (1)  $S_1 = 0$  for a labeled Ala-9  $^{13}\text{CO}$  separated by one or two bonds from a natural abundance  $^{15}\text{N}$  at Ala-10 or Ala-9. Ala-9  $S_1$  is not affected by other natural abundance  $^{15}\text{N}$ . (2)  $S_1 = 0$  for natural abundance backbone  $^{13}\text{CO}$ s at Glu-12 or Ala-13 which are separated by one or two bonds from the labeled Ala-13  $^{15}\text{N}$ .  $S_1 = S_0$  for other natural abundance backbone  $^{13}\text{CO}$  sites. Criteria (1) and (2) are based on the close distance ( $\leq 2.5 \text{ \AA}$ ) and consequent strong ( $\geq 200 \text{ Hz}$ ) dipolar coupling of  $^{13}\text{CO}$  and  $^{15}\text{N}$  nuclei separated by one or two bonds.
- A3.** Ten percent of the Ala-9  $^{13}\text{CO}$   $S_0$  is due to molecules in random coil structures. The Ala-9  $^{13}\text{CO}$  in these structures have  $S_1 = 0$  if criterion A2-(1) is satisfied and have  $S_1 = S_0$  otherwise. Previous solid-state NMR experiments suggest that the I4 peptide has  $17 \pm 6\%$

random coil structure but a lower random coil population is chosen in our analysis because some of the random coil  $^{13}\text{C}$  shifts are outside the 1 ppm integration range used to calculate  $S_0$  and  $S_1$  intensity values (*J. Am. Chem. Soc.*, **120**, 1998, 7039-7048).

The  $(\Delta S/S_0)^{cor}$  expression is calculated using the following parameters:  $U_C$  and  $U_N$ , the fractions of Ala-9  $^{12}\text{C}$  sites and Ala-13  $^{14}\text{N}$  sites, respectively;  $A_C$  and  $A_N$ , the  $^{13}\text{C}$  and  $^{15}\text{N}$  natural abundances, respectively;  $n$ , the total number of unlabeled peptide backbone CO sites in an I4 molecule; and  $h$ , the fraction of the Ala-9  $^{13}\text{C}$   $S_0$  signal due to molecules with regular secondary structure. A flow chart for the determination of  $(\Delta S/S_0)^{cor}$  is given in Figure S1.

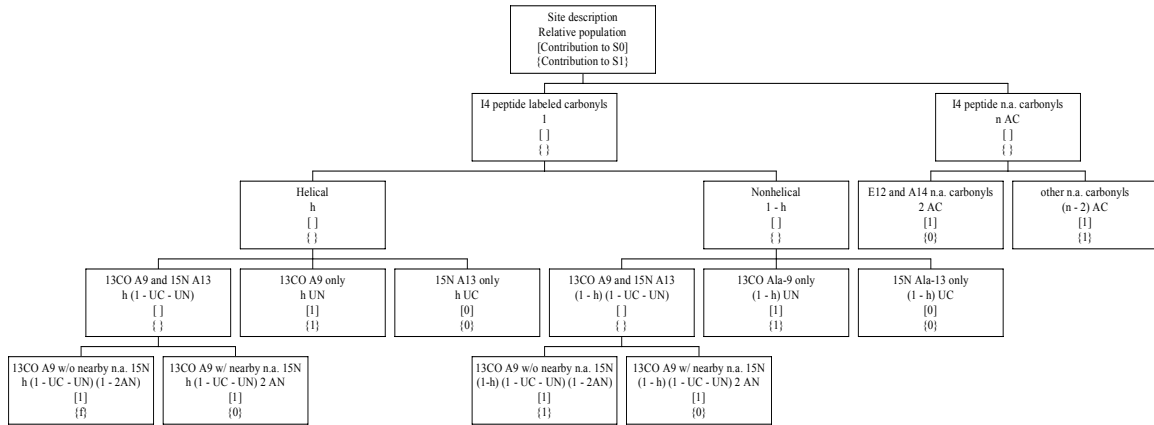

FIGURE S1. Flow chart of derivation of  $(\Delta S/S_0)^{cor}$  for REDOR of the I4 peptide. The four rows in each box are in sequence: the site description, its relative population, and its contributions to  $S_0$  and  $S_1$ .

### Derivation

Express  $S_0^{exp}$  as the sum of contributions from labeled  $^{13}\text{C}$  nuclei ( $S_0^{lab}$ ) and from natural abundance  $^{13}\text{C}$  nuclei ( $S_0^{n.a.}$ ):

$$S_0^{exp} = S_0^{lab} + S_0^{n.a.} = 1 - U_C + n A_C \quad (\text{S1})$$

with:

$$S_0^{lab} = h(1 - U_C - U_N) + hU_N + (1 - h)(1 - U_C - U_N) + (1 - h)U_N \quad (S2)$$

and:

$$S_0^{n.a.} = 2A_C + (n - 2)A_C \quad (S3)$$

Express  $S_1^{exp}$  as the sum of contributions from labeled  $^{13}\text{CO}$  nuclei ( $S_1^{lab}$ ) and from natural abundance  $^{13}\text{CO}$  nuclei ( $S_1^{n.a.}$ ):

$$S_1^{exp} = S_1^{lab} + S_1^{n.a.} \quad (S4)$$

with:

$$S_1^{lab} = h(1 - U_C - U_N)(1 - 2A_N)f + hU_N + (1 - h)(1 - U_C - U_N)(1 - 2A_N) + (1 - h)U_N \quad (S5)$$

and:

$$S_1^{n.a.} = (n - 2)A_C \quad (S6)$$

and the parameter  $f$ :

$$f = \frac{S_1^{cor}}{S_0^{cor}} = 1 - \frac{S_0^{cor} - S_1^{cor}}{S_0^{cor}} = 1 - \left( \frac{\Delta S}{S_0} \right)^{cor} \quad (S7)$$

Incorporate Eq. S7 into Eq. S5:

$$\begin{aligned} S_1^{lab} &= h(1 - U_C - U_N)(1 - 2A_N) \left[ 1 - \left( \frac{\Delta S}{S_0} \right)^{cor} \right] + (1 - h)(1 - U_C - U_N)(1 - 2A_N) + U_N \\ &= (1 - U_C - U_N)(1 - 2A_N) - h(1 - U_C - U_N)(1 - 2A_N) \left( \frac{\Delta S}{S_0} \right)^{cor} + U_N \end{aligned} \quad (S8)$$

$U_C$ ,  $U_N$ , and  $2A_N$  are much less than 1 so that:

$$(1 - U_C - U_N)(1 - 2A_N) \cong 1 - U_C - U_N - 2A_N \quad (S9)$$

and:

$$S_1^{lab} \cong 1 - U_C - 2A_N - h(1 - U_C - U_N - 2A_N) \left( \frac{\Delta S}{S_0} \right)^{cor} \quad (S10)$$

Incorporate Eqs. S6 and S10 in Eq. S4:

$$S_1^{exp} = 1 - U_C - 2A_N - h(1 - U_C - U_N - 2A_N) \left( \frac{\Delta S}{S_0} \right)^{cor} + (n - 2)A_C. \quad (S11)$$

Combine Eqs. S1, S2, S3, and S11:

$$S_0^{exp} - S_1^{exp} = [1 - U_C + nA_C] - \left[ 1 - U_C - 2A_N - h(1 - U_C - U_N - 2A_N) \left( \frac{\Delta S}{S_0} \right)^{cor} + (n - 2)A_C \right] \quad (S12)$$

and simplify:

$$S_0^{exp} - S_1^{exp} = 2A_C + 2A_N + h(1 - U_C - U_N - 2A_N) \left( \frac{\Delta S}{S_0} \right)^{cor} \quad (S13)$$

Combine Eqs. S1 and S13:

$$\left( \frac{\Delta S}{S_0} \right)^{exp} = \frac{2A_C + 2A_N + h(1 - U_C - U_N - 2A_N) \left( \frac{\Delta S}{S_0} \right)^{cor}}{1 - U_C + nA_C} \quad (S14)$$

and rewrite:

$$\left( \frac{\Delta S}{S_0} \right)^{cor} = \frac{1 - U_C + nA_C}{h(1 - U_C - U_N - 2A_N)} \left( \frac{\Delta S}{S_0} \right)^{exp} - \frac{2A_C + 2A_N}{h(1 - U_C - U_N - 2A_N)} \quad (S15)$$

Incorporate  $U_C = 0.01$ ,  $U_N = 0.01$ ,  $A_C = 0.011$ ,  $A_N = 0.0037$ ,  $n = 17$ , and  $h = 0.9$ :

$$\left( \frac{\Delta S}{S_0} \right)^{cor} = 1.345 \left( \frac{\Delta S}{S_0} \right)^{exp} - 0.034 \quad (S16)$$

*B. REDOR analysis of HFPtr-L7<sub>C</sub>F11<sub>N</sub> samples*

The following parameters/approximations are used and B1 and B2 are based on A1 and A2 for the I4 peptide.

**B1.** There is 99% labeling of the Leu-7  $^{13}\text{C}$ O and Phe-11  $^{15}\text{N}$  sites.  $S_1 = S_0$  for a labeled Leu-7  $^{13}\text{C}$ O in a peptide strand with a Phe-11  $^{14}\text{N}$ .

**B2.** (1)  $S_1 = 0$  for a labeled Leu-7  $^{13}\text{C}$ O separated by one or two bonds from a natural abundance  $^{15}\text{N}$  at Phe-8 or Leu-7. The Leu-7  $S_1$  is not affected by other natural abundance  $^{15}\text{N}$ . (2)  $S_1 = 0$  for natural abundance backbone  $^{13}\text{C}$ O sites at Gly-10 or Phe-11 which are separated by one or two bonds from the labeled Phe-11  $^{15}\text{N}$ .  $S_1 = S_0$  for other natural abundance backbone  $^{13}\text{C}$ O sites.

**B3.** In the HFPtr-L7<sub>C</sub>F11<sub>N</sub>/PC-PG sample, the natural abundance lipid  $^{13}\text{C}$ O signal is resolved from the Leu-7 labeled  $^{13}\text{C}$ O signal and does not contribute to  $S_0$  or  $S_1$ .

Using  $h = 1$ , Eq. (S15) is modified:

$$\left(\frac{\Delta S}{S_0}\right)^{cor} = \frac{1 - U_C + n A_C}{1 - U_C - U_N - 2A_N} \left(\frac{\Delta S}{S_0}\right)^{exp} - \frac{2A_C + 2A_N}{1 - U_C - U_N - 2A_N} \quad (\text{S17})$$

Consider  $n$  as the average number of unlabeled backbone CO sites per strand. Using  $U_C = 0.01$ ,  $U_N = 0.01$ ,  $A_C = 0.011$ ,  $A_N = 0.0037$ , and  $n = 29.33$ :

$$\left(\frac{\Delta S}{S_0}\right)^{cor} = 1.350 \left(\frac{\Delta S}{S_0}\right)^{exp} - 0.030 \quad (\text{S18})$$

### *C. fpCTDQBU analysis of the D-GFF SSNMR sample*

The following parameters/approximations are focused on the Gly-1  $^{13}\text{C}$ O nuclei because  $S_0$  and  $S_1$  signals from these nuclei are used in the experimental data analysis.

**C1.**  $^{13}\text{C}$ O signals from Gly-1, Phe-2, and Phe-3 are completely resolved.

**C2.** Intermolecular  $^{13}\text{C}$ - $^{13}\text{C}$  dipolar coupling is not considered. For Gly-1  $^{13}\text{C}$ O, the closest intermolecular carbon nucleus is  $> 4 \text{ \AA}$  away.

**C3.** For D-GFF, there is 99% labeling of Gly-1  $^{13}\text{C}$ O and Phe-3  $^{13}\text{C}$ O.  $S_1 = S_0$  for a molecule with a labeled Gly-1  $^{13}\text{C}$ O and a Phe-3  $^{12}\text{C}$ O.

**C4.**  $S_1$  values for a molecule with a labeled Gly-1  $^{13}\text{C}$ O and nearby natural abundance  $^{13}\text{C}$  are set with the following criteria: (1)  $S_1 = 0$  when  $\tau_i \leq 32$  ms and the labeled Gly-1  $^{13}\text{C}$ O/natural abundance  $^{13}\text{C}$  nuclei are separated by one or two bonds. (2)  $S_1 = 0$  when  $\tau_i > 32$  ms and the labeled Gly-1  $^{13}\text{C}$ O/natural abundance  $^{13}\text{C}$  nuclei are separated by one, two, or three bonds. (3)  $S_1$  is not affected by the natural abundance  $^{13}\text{C}$  if neither criterion (1) nor (2) is satisfied. The criteria are based on the  $\sim 1.5$  Å,  $\sim 2.5$  Å and  $\sim 3.8$  Å distances for one-, two- and three-bond  $^{13}\text{C}$ - $^{13}\text{C}$  separations, respectively, and the consequent 2200 Hz, 500 Hz, and 140 Hz dipolar couplings.

**C5.**  $S_1 = S_0$  for a natural abundance Gly-1  $^{13}\text{C}$ O in an unlabeled GFF molecule.

Each  $(\Delta S/S_0)^{cor}$  value is calculated using the following parameters:  $U_{C1}$  and  $U_{C2}$ , the fractions of Gly-1 and Phe-3  $^{12}\text{C}$ O sites in D-GFF, respectively;  $A_C$ , the fractional  $^{13}\text{C}$  natural abundance;  $n$ , the ratio of unlabeled GFF to D-GFF molecules in the crystal; and  $m$ , the number of unlabeled carbon nuclei which satisfy either criterion C4-(1) or C4-(2).

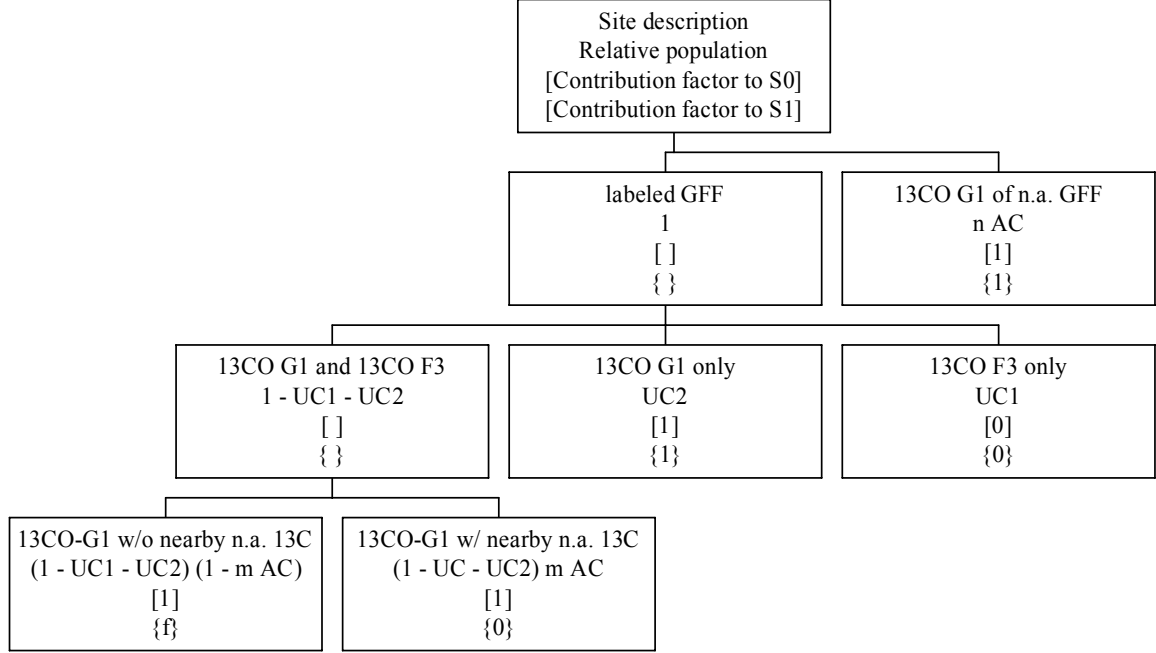

FIGURE S2. Flow chart of derivation of  $(\Delta S/S_0)^{cor}$  for fpCTDQBU of the D-GFF sample.

The fpCTDQBU expression for  $(\Delta S/S_0)^{cor}$  is:

$$\left(\frac{\Delta S}{S_0}\right)^{cor} = \frac{1 - U_{C1} + n A_C}{1 - U_{C1} - U_{C2} - m A_C} \left(\frac{\Delta S}{S_0}\right)^{exp} - \frac{m A_C}{1 - U_{C1} - U_{C2} - m A_C} \quad (S19)$$

The values of  $U_{C1}$ ,  $U_{C2}$ ,  $A_C$ , and  $n$  are 0.01, 0.01, 0.011, and 49. For  $\tau_i \leq 32$  ms,  $m = 2$  and numerical evaluation of Eq. S19 yields:

$$\left(\frac{\Delta S}{S_0}\right)^{cor} = 1.596 \left(\frac{\Delta S}{S_0}\right)^{exp} - 0.023 \quad (S20)$$

For  $\tau_i > 32$  ms,  $m = 4$  and numerical evaluation of Eq. S19 yields:

$$\left(\frac{\Delta S}{S_0}\right)^{cor} = 1.634 \left(\frac{\Delta S}{S_0}\right)^{exp} - 0.047 \quad (S21)$$

#### D. fpCTDQBU analysis of the HFPtr-L7CF11<sub>N</sub> sample

The following parameters/approximations are used:

**D1.** There is 99% labeling of Leu-7  $^{13}\text{C}$ O.

**D2.**  $S_1$  values for a Leu-7  $^{13}\text{C}$ O with nearby natural abundance  $^{13}\text{C}$  are determined by the following criteria: (1)  $S_1 = 0$  for  $\tau_i \leq 32$  ms and Leu-7  $^{13}\text{C}$ O/natural abundance  $^{13}\text{C}$  separated by one or two bonds. (2)  $S_1 = 0$  for  $\tau_i > 32$  ms and Leu-7  $^{13}\text{C}$ O/natural abundance  $^{13}\text{C}$  separated by one, two, or three bonds. (3)  $S_1$  is not affected by natural abundance  $^{13}\text{C}$  if neither criterion (1) nor (2) is satisfied.

**D3.** The following criteria are used to set  $S_1$  values for natural abundance backbone  $^{13}\text{C}$ O sites: (1) For the Ala-6 and Phe-8 sites,  $S_1 = S_0$  for  $\tau_i \leq 32$  ms and  $S_1 = 0$  for  $\tau_i > 32$  ms. These values are in accord with D2-(1) and D2-(2). (2) For other sites,  $S_1 = S_0$  for all values of  $\tau_i$ .

Each  $(\Delta S/S_0)^{cor}$  value is calculated using the parameters  $U_C$ ,  $A_C$ ,  $n$  and  $m$  where:  $U_C$  is the fraction of Leu-7  $^{12}\text{C}$ O sites;  $A_C$  is the fractional  $^{13}\text{C}$  natural abundance;  $n$  is the average number of unlabeled backbone CO sites per peptide strand; and  $m$  is the number of natural abundance sites which satisfies either D2-(1) or D2-(2).



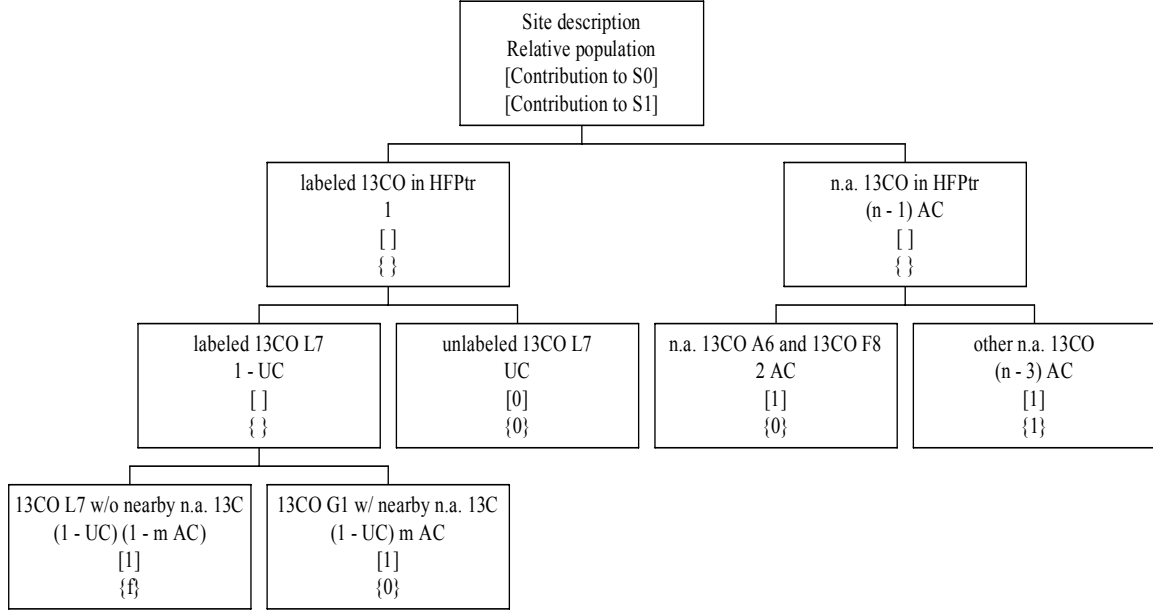

FIGURE S3. Flow chart of derivation of  $(\Delta S/S_0)^{cor}$  for fpCTDQBU of the HFPtr-L<sub>7</sub>C<sub>6</sub>F<sub>11</sub>N sample for  $\tau_i > 32$  ms.

A derivation similar to that for Eq. S19 yields an expression for  $\tau_i \leq 32$  ms:

$$\left(\frac{\Delta S}{S_0}\right)^{cor} = \frac{1 - U_C + n A_C}{1 - U_C - m A_C} \left(\frac{\Delta S}{S_0}\right)^{exp} - \frac{m A_C}{1 - U_C - m A_C} \quad (S22)$$

The values of  $U_C$ ,  $A_C$ ,  $n$ , and  $m$  are 0.01, 0.011, 29.33, and 3, respectively, and

numerical evaluation of Eq. S22 yields:

$$\left(\frac{\Delta S}{S_0}\right)^{cor} = 1.372 \left(\frac{\Delta S}{S_0}\right)^{exp} - 0.034; \quad (S23)$$

For  $\tau_i > 32$  ms, the contribution to  $S_1$  of natural abundance Ala-6 and Phe-8 <sup>13</sup>COs

slightly modifies Eq. S22:

$$\left(\frac{\Delta S}{S_0}\right)^{cor} = \frac{1 - U_C + n A_C}{1 - U_C - m A_C} \left(\frac{\Delta S}{S_0}\right)^{exp} - \frac{(m + 2) A_C}{1 - U_C - m A_C} \quad (S24)$$

The values of  $U_C$ ,  $A_C$ ,  $n$ , and  $m$  are 0.01, 0.011, 29.33, and 7, respectively, and numerical evaluation of Eq. S24 yields:

$$\left(\frac{\Delta S}{S_0}\right)^{cor} = 1.438 \left(\frac{\Delta S}{S_0}\right)^{exp} - 0.108 \quad (S25)$$

In Eqs. S22 and S24, the small fraction of Leu-7  $^{12}\text{CO}$  (denoted by the parameter  $U_C$ ) is considered in the calculation of total signal but is neglected in the calculation of the effect of  $^{13}\text{C}$ - $^{13}\text{C}$  dipolar coupling on  $S_1$ . This latter approximation neglects the possibilities of a Leu-7  $^{13}\text{CO}$  being near either one or two Leu-7  $^{12}\text{CO}$ s in adjacent strands. The approximation makes a much smaller contribution to the uncertainty in  $(\Delta S/S_0)^{cor}$  than does uncertainty in  $(\Delta S/S_0)^{exp}$ .

The experimental  $S_0$  and  $S_1$  intensities are determined by integration over a defined region and for the I4 and HFPtr samples, the contribution from a particular labeled or natural abundance  $^{13}\text{CO}$  site depends on its chemical shift distribution which is influenced by amino-acid identity as well as conformation. Deconvolution of individual site contributions is not feasible with the medium-linewidth ( $\sim 2$  ppm full-width at half-maximum) and medium signal-to-noise spectra and in the above derivations, we made the approximation in that labeled and natural abundance sites contribute fully to the  $S_0$  and  $S_1$  signals. For the HFPtr samples, the experimental signal-to-noise ratios are  $\sim 10$  and this approximation makes a much smaller contribution to the uncertainty in  $(\Delta S/S_0)^{cor}$  than does uncertainty in  $(\Delta S/S_0)^{exp}$ .
